# Supplementary material for: Human Milk Oligosaccharides and Bacterial Profile Modulate Infant Body Composition during Exclusive Breastfeeding
Source: MDPI journal article supplement (doi:10.3390/ijms23052865), 2022-03-05
Supplement: s1 [file s1]

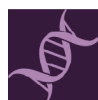

Article

# Human Milk Oligosaccharides and Bacterial Profile Modulate Infant Body Composition during Exclusive Breastfeeding

Ali S. Cheema <sup>1</sup>, Zoya Gridneva <sup>1</sup>, Annalee J. Furst <sup>2,3</sup>, Ana S. Roman <sup>2,3</sup>, Michelle L. Trevenen <sup>4</sup>, Berwin A. Turlach <sup>4</sup>, Ching T. Lai <sup>1</sup>, Lisa F. Stinson <sup>1</sup>, Lars Bode <sup>2,3</sup>, Matthew S. Payne <sup>5,6</sup> and Donna T. Geddes <sup>1,\*</sup>

<sup>1</sup> School of Molecular Sciences, The University of Western Australia, Crawley, WA 6009, Australia; alisadiq.cheema@research.uwa.edu.au (A.S.C.); zoya.gridneva@uwa.edu.au (Z.G.); ching-tat.lai@uwa.edu.au (C.T.L.); lisa.stinson@uwa.edu.au (L.F.S.);

<sup>2</sup> Larsson-Rosenquist Foundation Mother-Milk-Infant Center of Research Excellence, University of California San Diego, La Jolla, CA 92093, USA; aloeffler@health.ucsd.edu (A.J.F.); acroman@sdsu.edu (A.S.R.); lbode@health.ucsd.edu (L.B.)

<sup>3</sup> Department of Pediatrics, University of California San Diego, La Jolla, CA 92093, USA

<sup>4</sup> Centre for Applied Statistics, The University of Western Australia, Crawley, WA 6009, Australia; michelle.trevenen@uwa.edu.au (M.L.T.); berwin.turlach@uwa.edu.au (B.A.T.)

<sup>5</sup> Division of Obstetrics and Gynaecology, School of Medicine, The University of Western Australia, Subiaco, WA 6008, Australia; matthew.payne@uwa.edu.au

<sup>6</sup> Women and Infants Research Foundation, Subiaco, WA 6008, Australia

\* Correspondence: donna.geddes@uwa.edu.au; Tel.: +61-8-6488-4467

## Supplementary materials

Table S1. Maternal and infant characteristics based on maternal secretor status.

| Characteristics             | Cohort ( <i>n</i> = 60)                  | Secretor ( <i>n</i> = 49)                | Non-Secretor ( <i>n</i> = 11)          | <i>p</i> -Value |
|-----------------------------|------------------------------------------|------------------------------------------|----------------------------------------|-----------------|
|                             | Mean ± SD (Min-Max)<br>or <i>n</i> (%)   | Mean ± SD (Min-Max)<br>or <i>n</i> (%)   | Mean ± SD (Min-Max)<br>or <i>n</i> (%) |                 |
| Maternal characteristics    |                                          |                                          |                                        |                 |
| Age at infant birth (years) | 32.9 ± 4.7<br>(25.1–46.4)                | 32.8 ± 5.0<br>(25.1–46.4)                | 33.3 ± 3.0<br>(30.0–40.8)              | 0.66            |
| Ethnicity                   |                                          |                                          |                                        |                 |
| Caucasian                   | 51 (85)                                  | 41 (86.7)                                | 10 (90.9)                              | -               |
| Asian                       | 5 (8.3)                                  | 5 (10.2)                                 | -                                      | -               |
| Other                       | 4 (6.6)                                  | 3 (6.1)                                  | 1 (9.1)                                | -               |
| Parity                      | 2.1 ± 0.8<br>(1–4)                       | 1.9 ± 0.8<br>(1–4)                       | 2.5 ± 0.7<br>(2–4)                     | 0.06            |
| Mode of delivery            |                                          |                                          |                                        | 0.07            |
| Vaginal                     | 38 (63.3)                                | 28 (51.1)                                | 10 (90.9)                              |                 |
| Elective caesarean section  | 14 (23.3)                                | 14 (28.6)                                | -                                      | -               |
| Emergency caesarean section | 8 (13.3)                                 | 7 (14.3)                                 | 1 (9.1)                                | -               |
| Height (cm)                 | 164.9 ± 6.7<br>(148.0–178.0)             | 164.5 ± 6.7<br>(148.0–178.0)             | 166.4 ± 7.2<br>(154.0–178.0)           | 0.45            |
| Weight (kg)                 | 72.3 ± 15.1<br>(47.5–119.8) <sup>a</sup> | 72.0 ± 16.3<br>(47.5–119.8) <sup>d</sup> | 73.8 ± 7.2<br>(63.1–86.6) <sup>f</sup> | 0.60            |
| Infant characteristics      |                                          |                                          |                                        |                 |
| Gestational age (weeks)     | 39.3 ± 1.2<br>(37.0–41.2)                | 39.3 ± 1.2<br>(37.0–41.2)                | 39.3 ± 1.1<br>(37.4–41.1)              | 0.85            |
| Male                        | 29 (48.3)                                | 23 (46.9)                                | 6 (54.5)                               | -               |
| Female                      | 31 (51.7)                                | 26 (53.1)                                | 5 (45.5)                               | -               |

|                          |                                              |                                              |                                             |      |
|--------------------------|----------------------------------------------|----------------------------------------------|---------------------------------------------|------|
| Birth weight (kg)        | 3.479 ± 0.432<br>(2.363–4.705)               | 3.488 ± 0.436<br>(2.363–4.705)               | 3.438 ± 0.432<br>(2.815–4.310)              | 0.73 |
| Birth length (cm)        | 50.9 ± 2.4<br>(46.0–59.0)                    | 50.9 ± 2.4<br>(46.0–59.0)                    | 50.6 ± 2.1<br>(46.0–53.5)                   | 0.64 |
| Weight (kg)              | 6.161 ± 0.763<br>(4.638–8.410) <sup>a</sup>  | 6.116 ± 0.719<br>(4.638–8.204) <sup>d</sup>  | 6.365 ± 0.951<br>(5.038–8.410) <sup>f</sup> | 0.45 |
| Length (cm)              | 61.1 ± 2.6<br>(55.5–67.0) <sup>a</sup>       | 60.9 ± 2.5<br>(55.5–67.0) <sup>d</sup>       | 62.1 ± 2.7<br>(58.5–67.0) <sup>f</sup>      | 0.22 |
| Head circumference (cm)  | 40.7 ± 1.2<br>(37.5–43.0) <sup>b</sup>       | 40.6 ± 1.3<br>(37.5–43.0) <sup>e</sup>       | 41.0 ± 1.1<br>(39.2–42.5) <sup>g</sup>      | 0.37 |
| 24-hour milk intake (mL) | 784.7 ± 171.7<br>(511.7–1304.9) <sup>c</sup> | 788.2 ± 179.1<br>(511.7–1304.9) <sup>f</sup> | 767.6 ± 137.9<br>(561.2–999.0) <sup>h</sup> | 0.72 |

Data are mean ± SD and ranges or percentage. All anthropometrics were measured at 3 months' postpartum unless otherwise stated. *p*-value describe the difference between secretor and non-secretor mothers (Welch's *t*-test for continuous maternal and infant characteristics and fisher's exact test for parity and mode of delivery) and significant *p*-values are shown as bold text. <sup>a</sup> *n* = 55, <sup>b</sup> *n* = 50, <sup>c</sup> *n* = 47, <sup>d</sup> *n* = 45, <sup>e</sup> *n* = 40, <sup>f</sup> *n* = 39, <sup>g</sup> *n* = 10, <sup>h</sup> *n* = 8.

**Table S2.** Maternal and infant body composition at 3 months' postpartum.

| Body Composition                           | Cohort ( <i>n</i> = 55)                    | Secretor ( <i>n</i> = 45)                  | Non-Secretor ( <i>n</i> = 10) |
|--------------------------------------------|--------------------------------------------|--------------------------------------------|-------------------------------|
| Maternal                                   |                                            |                                            |                               |
| Fat-free mass (kg) *                       | 3.81 (0.16)<br>(18.0–70.89)                | 3.80 (0.22)<br>(18–70.89)                  | 3.84 (0.02)<br>(44.16–51.96)  |
| Fat-free mass index (kg/m <sup>2</sup> ) * | 2.82 (0.17)<br>(6.30–23.96)                | 2.81 (0.17)<br>(6.3–23.96)                 | 2.85 (0.12)<br>(14.93–19.54)  |
| Fat mass (kg) *                            | 3.20 (0.40)<br>(11.25–53.93)               | 3.19 (0.40)<br>(11.25–53.93)               | 3.25 (0.25)<br>(17.78–40.49)  |
| Fat mass index (kg/m <sup>2</sup> ) *      | 2.18 (0.41)<br>(3.94–18.99)                | 2.16 (0.40)<br>(3.94–18.99)                | 2.19 (0.39)<br>(6.45–16.02)   |
| Fat mass (%)                               | 35.79 ± 6.01<br>(21.88–53.35)              | 35.74 ± 6.15<br>(21.88–53.35)              | 36.04 ± 5.6<br>(28.18–46.75)  |
| Fat mass to fat-free mass ratio *          | −0.63 (0.33)<br>(0.37–1.14)                | −0.63 (0.31)<br>(0.37–1.14)                | −0.63 (0.30)<br>(0.39–0.88)   |
| Body mass index (kg/m <sup>2</sup> )       | 26.63 ± 5.18<br>(18.00–40.95)              | 26.5 ± 5.41<br>(18–40.95)                  | 27.23 ± 4.18<br>(21.57–34.25) |
| Infant                                     |                                            |                                            |                               |
| Fat-free mass (kg)                         | 4.59 ± 0.52<br>(3.8–6.01) <sup>a</sup>     | 4.56 ± 0.51<br>(3.8–6.01) <sup>c</sup>     | 4.69 ± 0.59<br>(3.88–5.91)    |
| Fat-free mass index (kg/m <sup>2</sup> )   | 14.98 ± 1.27<br>(12.93–18.52) <sup>a</sup> | 14.96 ± 1.26<br>(12.93–18.52) <sup>c</sup> | 15.1 ± 1.34<br>(13.25–17.63)  |
| Fat mass (kg)                              | 1.57 ± 0.3<br>(0.84–2.50) <sup>a</sup>     | 1.54 ± 0.29<br>(0.84–2.2) <sup>c</sup>     | 1.67 ± 0.37<br>(1.16–2.5)     |
| Fat mass index (kg/m <sup>2</sup> )        | 5.1 ± 0.85<br>(3.02–7.47) <sup>a</sup>     | 5.05 ± 0.82<br>(3.02–6.76) <sup>c</sup>    | 5.35 ± 0.98<br>(3.97–7.47)    |
| Fat mass (%)                               | 25.3 ± 2.49<br>(17.11–29.76) <sup>a</sup>  | 25.14 ± 2.57<br>(17.11–29.04) <sup>c</sup> | 26.01 ± 2.08<br>(22.7–29.76)  |
| Fat mass to fat-free mass ratio            | 0.34 ± 0.04<br>(0.21–0.42) <sup>a</sup>    | 0.34 ± 0.04<br>(0.21–0.41) <sup>c</sup>    | 0.35 ± 0.04<br>(0.29–0.42)    |
| Body mass index (kg/m <sup>2</sup> )       | 16.47 ± 1.29<br>(14.05–19.92)              | 16.47 ± 1.3<br>(14.05–19.92)               | 16.45 ± 1.31<br>(14.68–18.73) |

|                                       |                                          |                                          |                              |
|---------------------------------------|------------------------------------------|------------------------------------------|------------------------------|
| Weight-for-length z-score             | −0.09 ± 0.88<br>(−1.82–2.54)             | −0.07 ± 0.92<br>(−1.82–2.54)             | −0.18 ± 0.74<br>(−1.47–1.00) |
| Weight-for-age z-score                | 0.02 ± 0.89<br>(−2.79–2.49)              | −0.03 ± 0.85<br>(−2.79–2.2)              | 0.23 ± 1.04<br>(−1.13–2.49)  |
| Length-for-age z-score                | 0.22 ± 1.17<br>(−3.09–2.83)              | 0.13 ± 1.15<br>(−3.09–2.74)              | 0.62 ± 1.27<br>(−1.36–2.83)  |
| BMI-for-age z-score                   | −0.09 ± 0.82<br>(−1.63–1.95)             | −0.08 ± 0.84<br>(−1.63–1.95)             | −0.15 ± 0.75<br>(−1.14–1.23) |
| Head circumference-for-age<br>z-score | 0.54 ± 0.99<br>(−2.47–2.56) <sup>b</sup> | 0.49 ± 1.02<br>(−2.47–2.56) <sup>d</sup> | 0.74 ± 0.91<br>(−1.13–1.76)  |

Data are mean ± SD and ranges. \* Data log transformed and presented as median (interquartile range) and ranges. <sup>a</sup> *n* = 53, <sup>b</sup> *n* = 50, <sup>c</sup> *n* = 43, <sup>d</sup> *n* = 40. BMI – body mass index.

**Table S4.** Concentrations of the HMOs in human milk samples.

| HMO        | Cohort ( <i>n</i> = 60)           | Secretor ( <i>n</i> = 49)           | Non-Secretor ( <i>n</i> = 11)     | <i>p</i> -Value |
|------------|-----------------------------------|-------------------------------------|-----------------------------------|-----------------|
| 2'FL       | 1517.97 ± 952<br>(0.29–3865.53)   | 1854.43 ± 696.13<br>(676.0–3865.53) | 19.18 ± 57.19<br>(0.29–191.46)    | <0.001          |
| 3FL *      | 7.38 (0.77)<br>(132.64–2493.99)   | 7.48 (0.49)<br>(132.64–1506.81)     | 0.17 (1.36)<br>(461.38–2493.99)   | <0.001          |
| DFLac *    | 5.25 (0.81)<br>(0.84–1043.33)     | 5.32 (0.60)<br>(71.52–1043.33)      | 1.45 (0.82)<br>(0.84–72.14)       | <0.001          |
| 3'SL       | 88.49 ± 33.54<br>(10.25–211.85)   | 92.03 ± 33.54<br>(28.32–211.84)     | 73.80 ± 30.61<br>(10.25–125.67)   | 0.10            |
| 6'SL       | 149.14 ± 63.07<br>(23.49–369.20)  | 153.11 ± 62.80<br>(35.02–369.20)    | 131.50 ± 64.18<br>(23.49–234.27)  | 0.33            |
| LNT *      | 6.35 (0.70)<br>(202.88–1571.33)   | 6.33 (0.53)<br>(202.88–1565.09)     | 6.95 (0.62)<br>(472.84–1571.33)   | 0.006           |
| LNnT *     | 4.37 (0.94)<br>(6.79–245.68)      | 4.57 (0.76)<br>(29.92–245.68)       | 3.51 (0.65)<br>(6.79–74.97)       | <0.001          |
| LNFP I *   | 5.68 (1.28)<br>(67.08–1671.46)    | 5.98 (1.19)<br>(94.07–1671.46)      | 4.64 (0.50)<br>(67.08–165.66)     | <0.001          |
| LNFP II *  | 6.40 (0.56)<br>(194.60–1795.52)   | 6.33 (0.45)<br>(194.60–1180.69)     | 7.19 (0.54)<br>(436.74–1795.52)   | <0.001          |
| LNFP III * | 2.21 (0.68)<br>(1.83–23.87)       | 2.26 (0.68)<br>(2.84–23.87)         | 2.08 (0.55)<br>(1.83–21.32)       | 0.34            |
| LSTb *     | 4.18 (0.57)<br>(15.90–154.02)     | 4.10 (0.57)<br>(15.90–154.02)       | 4.51 (0.35)<br>(38.01–146.42)     | 0.003           |
| LSTc *     | 4.06 (0.74)<br>(10.87–156.86)     | 4.16 (0.67)<br>(20.52–156.86)       | 3.58 (0.73)<br>(10.87–73.31)      | <0.004          |
| DFLNT      | 722.41 ± 362.42<br>(7.54–1680.79) | 811.0 ± 334.26<br>(7.54–1680.79)    | 327.76 ± 169.97<br>(25.91–633.51) | <0.001          |
| LNH *      | 3.98 (0.71)<br>(14.87–112.50)     | 4.02 (0.55)<br>(14.87–112.50)       | 3.77 (0.51)<br>(20.79–78.08)      | 0.07            |
| DSLNT      | 123.99 ± 45.61<br>(39.09–254.36)  | 123.40 ± 46.94<br>(39.09–254.36)    | 126.62 ± 41.10<br>(51.92–195.20)  | 0.822           |
| FLNH       | 200.56 ± 82.17<br>(57.98–422.69)  | 200.01 ± 82.0<br>(57.98–422.69)     | 202.97 ± 86.93<br>(85.14–343.37)  | 0.919           |
| DFLNT *    | 4.40 (1.39)<br>(6.42–419.15)      | 4.23 (1.28)<br>(6.42–419.15)        | 4.82 (0.70)<br>(33.08–193.06)     | 0.027           |
| FDSLNT *   | 5.43 (1.01)<br>(5.52–916.90)      | 5.06 (1.12)<br>(5.52–690.77)        | 6.29 (0.59)<br>(175.67–916.90)    | <0.001          |

|       |                                  |                                  |                                  |       |
|-------|----------------------------------|----------------------------------|----------------------------------|-------|
| DSLNH | 119.11 ± 52.09<br>(31.50–235.36) | 120.50 ± 51.43<br>(31.50–235.36) | 112.90 ± 57.10<br>(38.17–196.32) | 0.691 |
|-------|----------------------------------|----------------------------------|----------------------------------|-------|

Data are mean ± SD and ranges. \* Data were log transformed and presented as median (interquartile range) and ranges. Concentrations are in µg/mL. *p*-value describes the difference between secretor and non-secretor groups (Welch's *t*-test) and significant *p*-values are shown in bold text. 2'FL – 2'-fucosyllactose; 3'SL – 3'-sialyllactose; 3FL – 3-fucosyllactose; 6'SL – 6'-sialyllactose; DFLac – difucosyllactose; DFLNH – difucosyllacto-N-hexaose; DFLNT – difucosyllacto-N-tetraose; DSLNH – disialyllacto-N-hexaose; DSLNT – disialyllacto-N-tetraose; FDSLNH – fucodisialyllacto-N-hexaose; FLNH – fucosyllacto-N-hexaose; LNFP I – lacto-N-fucopentaose; LNFP II – lacto-N-fucopentaose II; LNFP III – lacto-N-fucopentaose; LNH – lacto-N-hexaose; LNnT – lacto-N-neotetraose; LNT – lacto-N-tetraose; LSTb – sialyl-lacto-N-tetraose b; LSTc – sialyl-lacto-N-tetraose c.

**Table S5.** 24-hour intakes of the HMOs.

| HMO       | Cohort (n = 47)                     | Secretor (n = 38)                    | Non-Secretor (n = 9)                 | <i>p</i> -Value  |
|-----------|-------------------------------------|--------------------------------------|--------------------------------------|------------------|
| 2'FL      | 1206.44 ± 728.09<br>(0.22–2729.05)  | 1449.76 ± 533.09<br>(524.63–2729.05) | 20.28 ± 54.90<br>(0.22–156.14)       | <b>&lt;0.001</b> |
| 3FL       | 669.81 ± 417.99<br>(134.97–1820.51) | 533.36 ± 322.60<br>(134.97–1436.59)  | 1237.49 ± 373.29<br>(688.47–1820.51) | <b>0.001</b>     |
| DFLac *   | 4.98 (0.81)<br>(0.71–1057.51)       | 5.08 (0.69)<br>(43.47–1057.51)       | 1.13 (0.67)<br>(0.71–58.84)          | <b>&lt;0.001</b> |
| 3'SL *    | 4.25 (0.47)<br>(8.36–194.26)        | 4.28 (0.48)<br>(30.45–194.26)        | 3.95 (0.35)<br>(8.36–79.30)          | 0.084            |
| 6'SL      | 114.15 ± 47.20<br>(23.46–263.46)    | 118.25 ± 46.49<br>(33.99–263.46)     | 94.14 ± 48.54<br>(23.46–160.92)      | 0.23             |
| LNT *     | 6.12 (0.63)<br>(161.70–1117.23)     | 6.11 (0.60)<br>(161.70–1030.59)      | 6.62 (0.86)<br>(265.34–1117.23)      | 0.073            |
| LNnT      | 69.28 ± 37.66<br>(6.78–155.75)      | 77.99 ± 34.92<br>(22.56–155.75)      | 26.80 ± 14.62<br>(6.78–50.97)        | <b>&lt;0.001</b> |
| LNFP I *  | 5.46 (1.02)<br>(37.64–1092.25)      | 5.60 (0.88)<br>(67.13–1092.25)       | 4.45 (0.72)<br>(37.64–157.0)         | <b>&lt;0.001</b> |
| LNFP II * | 6.01 (0.69)<br>(170.63–1383.07)     | 5.96 (0.55)<br>(170.63–978.65)       | 6.88 (0.62)<br>(506.55–1383.07)      | <b>&lt;0.001</b> |
| LNFP III  | 7.47 ± 3.42<br>(1.42–17.73)         | 7.76 ± 3.45<br>(2.03–17.73)          | 6.09 ± 3.08<br>(1.42–9.36)           | 0.200            |
| LSTb *    | 3.86 (0.79)<br>(11.35–133.04)       | 3.79 (0.74)<br>(11.35–114.40)        | 4.26 (0.39)<br>(29.52–133.04)        | <b>0.033</b>     |
| LSTc      | 51.40 ± 27.43<br>(6.10–122.14)      | 56.42 ± 26.75<br>(21.17–122.14)      | 26.91 ± 15.32<br>(6.10–58.93)        | <b>&lt;0.001</b> |
| DFLNT     | 597.64 ± 333.62<br>(4.58–1605.39)   | 667.31 ± 320.21<br>(4.58–1605.39)    | 257.97 ± 126.18<br>(122.26–505.09)   | <b>&lt;0.001</b> |
| LNH *     | 3.70 (0.45)<br>(11.6–143.20)        | 3.79 (0.56)<br>(19.76–143.20)        | 3.38 (0.40)<br>(11.66–48.54)         | <b>0.017</b>     |
| DSLNT     | 97.22 ± 40.96<br>(27.89–193.28)     | 96.81 ± 40.29<br>(27.89–193.28)      | 99.18 ± 46.97<br>(40.33–167.12)      | 0.897            |
| FLNH *    | 4.98 (0.52)<br>(53.88–396.43)       | 5.01 (0.46)<br>(53.88–396.43)        | 4.79 (0.65)<br>(69.43–239.49)        | 0.42             |
| DFLNH *   | 4.18 (1.68)<br>(7.68–276.14)        | 3.86 (1.69)<br>(7.68–276.14)         | 4.49 (0.83)<br>(35.20–167.26)        | <b>0.04</b>      |
| FDSLNH *  | 5.14 (1.32)<br>(3.50–769.32)        | 4.76 (1.21)<br>(3.50–769.32)         | 5.83 (0.32)<br>(280.46–653.57)       | <b>&lt;0.001</b> |
| DSLNH *   | 4.42 (0.80)<br>(21.42–185.06)       | 4.45 (0.72)<br>(24.16–185.06)        | 4.18 (1.02)<br>(21.42–171.53)        | 0.503            |

Data are mean  $\pm$  SD and ranges. \* Data log transformed and presented as median (interquartile range) and ranges. HMOs intakes are measured as  $\mu\text{g/L}$ .  $p$ -value describes the difference between secretor and non-secretor groups (Welch's  $t$ -test) and significant  $p$ -values are shown in bold text. 2'FL – 2'-fucosyllactose; 3'SL – 3'-sialyllactose; 3FL – 3-fucosyllactose; 6'SL – 6'-sialyllactose; DFLac – difucosyllactose; DFLNH – difucosyllacto-N-hexaose; DFLNT – difucosyllacto-N-tetraose; DSLNH – disialyllacto-N-hexaose; DSLNT – disialyllacto-N-tetraose; FDSLNH – fucodisialyllacto-N-hexaose; FLNH – fucosyllacto-N-hexaose; LNFP I – lacto-N-fucopentaose; LNFP II – lacto-N-fucopentaose II; LNFP III – lacto-N-fucopentaose; LNH – lacto-N-hexaose; LNnT – lacto-N-neotetraose; LNT – lacto-N-tetraose; LSTb – sialyl-lacto-N-tetraose b; LSTc – sialyl-lacto-N-tetraose c.

**Table S6.** Associations of parity and mode of delivery with human milk components and infant body composition.

| Predictor                                  | Non-Secretor |        |            |                 | Secretor |              |                 |      | Interaction |            |
|--------------------------------------------|--------------|--------|------------|-----------------|----------|--------------|-----------------|------|-------------|------------|
|                                            | Intercept    | SE     | $p$ -Value | Parameter Value | SE       | $p$ -Value   | Parameter Value | SE   | $p$ -Value  | $p$ -Value |
| HMO concentration                          |              |        |            |                 |          |              |                 |      |             |            |
| Log (LNFP III)                             |              |        |            |                 |          |              |                 |      |             |            |
| Parity (2)                                 | 2.4661       | 0.2642 | <0.001     | −0.86           | 0.32     | <b>0.01</b>  | −0.26           | 0.15 | 0.10        | 0.06       |
| Human milk bacteria                        |              |        |            |                 |          |              |                 |      |             |            |
| OTU05 ( <i>Streptococcus parasanguis</i> ) |              |        |            |                 |          |              |                 |      |             |            |
| MOD (ECS)                                  | −0.84        | 0.77   | 0.28       | −1.85           | 1.26     | 0.15         | 2.53            | 0.93 | <b>0.01</b> | <0.001     |
| Infant body composition                    |              |        |            |                 |          |              |                 |      |             |            |
| Weight (kg)                                |              |        |            |                 |          |              |                 |      |             |            |
| MOD (ECS)                                  | 6.2119       | 0.3523 | <0.001     | 2.20            | 0.80     | <b>0.01</b>  | −0.26           | 0.35 | 0.46        | 0.004      |
| Fat mass (kg)                              |              |        |            |                 |          |              |                 |      |             |            |
| MOD (ECS)                                  | 1.6419       | 0.1398 | <0.001     | 0.86            | 0.32     | <b>0.01</b>  | −0.10           | 0.14 | 0.46        | 0.005      |
| Log fat-free mass (kg)                     |              |        |            |                 |          |              |                 |      |             |            |
| MOD (ECS)                                  | 1.5168       | 0.0534 | <0.001     | 0.26            | 0.12     | <b>0.04</b>  | −0.03           | 0.05 | 0.52        | 0.02       |
| Fat mass index (kg/m <sup>2</sup> )        |              |        |            |                 |          |              |                 |      |             |            |
| MOD (ECS)                                  | 5.3269       | 0.3994 | <0.001     | 2.14            | 0.90     | <b>0.02</b>  | −0.33           | 0.39 | 0.40        | 0.01       |
| Cohort                                     |              |        |            |                 |          |              |                 |      |             |            |
| HMO concentrations                         |              |        |            |                 |          |              |                 |      |             |            |
| Log (LNFP II)                              |              |        |            |                 |          |              |                 |      |             |            |
| Parity (3+)                                | 6.856        | 0.165  | <0.001     | 0.30            | 0.14     | <b>0.03</b>  |                 |      |             |            |
| Log (FDSLNH)                               |              |        |            |                 |          |              |                 |      |             |            |
| MOD (ECS)                                  | 5.6535       | 0.3631 | <0.001     | 1.08            | 0.37     | <b>0.005</b> |                 |      |             |            |

Data are parameter value  $\pm$  standard error of measurement (SE). ANOVA was fit for parity and mode of delivery. Significant  $p$ -values indicated by the bold text. ECS – emergency caesarean section; FDSLNH – fucodisialyllacto-N-hexaose; LNFP II – lacto-N-fucopentaose II and LNFP III – lacto-N-fucopentaose III; MOD – mode of delivery.

**Table S7.** Summary of OTUs detected in negative extraction controls ( $n = 2$ ) and negative PCR controls ( $n = 2$ ).

| OTUs   | Genus                                             | Extraction Control 1 | Extraction Control 2 | PCR Control 1 | PCR Control 2 |
|--------|---------------------------------------------------|----------------------|----------------------|---------------|---------------|
| OTU20  | <i>Burkholderia-Caballeronia-Paraburkholderia</i> |                      | 65                   |               | 13089         |
| OTU29  | <i>Allorhizobi-</i>                               |                      | 27                   |               | 7083          |
|        | <i>um-Neorhizobium-Pararhizobium-Rhizobium</i>    |                      |                      |               |               |
| OTU17  | <i>Vibrionimonas</i>                              | 15617                |                      |               | 453           |
| OTU40  | <i>Schlegelella</i>                               | 823                  |                      |               | 23            |
| OTU106 | <i>Vibrionimonas</i>                              | 507                  |                      |               | 15            |

|        |                       |     |    |      |     |
|--------|-----------------------|-----|----|------|-----|
| OTU01  | <i>Streptococcus</i>  | 7   | 14 | 7    | 9   |
| OTU23  | <i>Bradyrhizobium</i> | 246 |    |      | 7   |
| OTU39  | <i>Lawsonella</i>     |     |    | 1147 |     |
| OTU515 | <i>Vibrionimonas</i>  | 11  |    |      |     |
| OTU03  | <i>Streptococcus</i>  |     | 6  |      |     |
| Others | Others                | 298 | 26 | 25   | 316 |

Only OTUs forming more than 5 reads in controls are presented. OTU – operational taxonomic unit; PCR – polymerase chain reaction.
